# Supplementary material for: Large errors in soil carbon measurements attributed to inconsistent sample processing
Source: Copernicus journal article supplement (doi:10.5194/soil-11-17-2025), 2025-01-08
Supplement: Supplementary file 1 [file soil-11-17-2025-supplement.pdf]

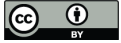

*Supplement of*

## **Large errors in soil carbon measurements attributed to inconsistent sample processing**

**Rebecca J. Even et al.**

*Correspondence to:* Rebecca J. Even ([rebecca.even@colostate.edu](mailto:rebecca.even@colostate.edu))

The copyright of individual parts of the supplement might differ from the article licence.

**Table S1:** Results of an informal survey among 51 soil testing laboratories where laboratories were asked to provide a method for soil sieving (i.e., initial homogenization) of bulk soils. Participants remain anonymous. NAPT is an acronym for the North American Proficiency Testing program.

| Lab ID | NAPT certification | Sieving procedure       | Lab ID | NAPT certification | Sieving procedure       |
|--------|--------------------|-------------------------|--------|--------------------|-------------------------|
| A      | Yes                | no specification        | AH     | Yes                | unspecified             |
| AO     | No                 | NA                      | AS     | Yes                | Dynacrush flail grinder |
| AN     | Yes                | Hammermill grinder      | K      | Yes                | unspecified             |
| AG     | No                 | AgVise grinder          | AP     | Yes                | Dynacrush flail grinder |
| AQ     | No                 | Dynacrush flail grinder | L      | Yes                | unclear "very fine"     |
| E      | Yes                | Flail grinder           | BD     | Yes                | Dynacrush flail grinder |
| F      | Yes                | Flail grinder           | O      | Yes                | Flail grinder           |
| G      | Yes                | Customized grinder      | AW     | Yes                | Dynacrush flail grinder |
| B      | Yes                | Customized grinder      | AM     | Yes                | Dynacrush flail grinder |
| H      | Yes                | Dynacrush flail grinder | P      | Yes                | Dynacrush flail grinder |
| I      | Yes                | Dynacrush flail grinder | AX     | Yes                | Custom grinder          |
| AU     | Yes                | Flail grinder           | AZ     | Yes                | Grinder unspecified     |
| C      | Yes                | NASCO grinder           | Q      | Yes                | unspecified             |
| D      | No                 | Mortar & pestle         | R      | Yes                | unspecified             |
| AD     | Yes                | Mortar & pestle         | S      | Yes                | Grinder - manual        |
| AC     | Yes                | Grinder unspecified     | T      | Yes                | Grinder unspecified     |
| BC     | Yes                | AgVise grinder          | AR     | Yes                | Dynacrush flail grinder |
| J      | Yes                | Dynacrush flail grinder | AY     | Yes                | Dynacrush flail grinder |
| AT     | Yes                | unspecified             | U      | Yes                | Grinder unspecified     |
| AI     | Yes                | Dynacrush flail grinder | W      | Yes                | Hammermill grinder      |
| BB     | Yes                | Dynacrush flail grinder | X      | Yes                | Grinder unspecified     |
| AB     | Yes                | Hammermill grinder      | AE     | Yes                | AgVise grinder          |
| AJ     | Yes                | unspecified             | Y      | Yes                | Hammermill grinder      |
| AV     | Yes                | unspecified             | Z      | Yes                | unspecified             |
| AK     | Yes                | unspecified             | AA     | Yes                | unspecified             |
| BA     | Yes                | Dynacrush flail grinder |        |                    |                         |

**Table S2:** The external service laboratory methods outlined for sieving, fine grinding, and drying for the measurements of % total carbon (TC), % soil inorganic carbon (SIC), and % soil organic carbon (SOC). The quantification methods for % TC, SIC, and SOC are presented where EA stands for dry combustion by elemental analyzer.

| <b>Lab ID</b> | <b>Sieving</b>                  | <b>Fine grinding</b> | <b>Drying</b>                            | <b>TC quantification</b> | <b>SIC quantification</b> | <b>SOC quantification</b> |
|---------------|---------------------------------|----------------------|------------------------------------------|--------------------------|---------------------------|---------------------------|
| I             | Mechanical grinder to 2 mm      | no                   | air-dried                                | EA                       | TC-SOC                    | acidify EA                |
| II            | Mechanical grinder to 2 mm      | no                   | 45 °C                                    | EA                       | TC-SOC                    | acidify EA                |
| III           | Mechanical grinder to 1 mm      | no                   | air-dried                                | EA                       | TC-SOC                    | acidify EA                |
| IV            | Mechanical grinder to 2mm       | no                   | air-dried                                | EA                       | TC-SOC                    | acidify EA                |
| V             | 8 mm + mortar and pestle to 2mm | Ball mill            | air-dried with moisture correction       | EA                       | Pressure transducer       | TC-SIC                    |
| VI            | Mechanical grinder to 2mm       | no                   | air-dried with 1-2 % moisture correction | EA                       | Pressure transducer       | TC-SIC                    |
| VII           | Mortar and pestle to 2mm        | no                   | 105 °C                                   | EA                       | EA                        | EA                        |
| VII I         | Mortar and pestle to 2mm        | no                   | air-dried                                | EA                       | gravimetric               | TC-SIC                    |

**Table S3:** Summary for each model built using the United States Department of Agriculture Natural Resources Conservation Service National Soil Survey Center-Kellogg Soil Survey coupled with partial least squares regression in OPUS (OPUS version 8.5, Bruker Optik GmbH 2020) describing the soil property of interest for prediction, spectral library boundaries, spectral pre-processing for model optimization, and the validation model R<sup>2</sup> and root mean square error of prediction (RMSEP).

| Soil Property    | Area Name        | Spectral pre-processing                       | R <sup>2</sup> | RMSEP |
|------------------|------------------|-----------------------------------------------|----------------|-------|
| Total Carbon     | Colorado         | First derivative + Vector normalization (SNV) | 0.9506         | 0.433 |
| Total Carbon     | Wyoming          | First derivative + Vector normalization (SNV) | 0.9543         | 0.442 |
| Total Carbon     | Iowa or Nebraska | First derivative + Vector normalization (SNV) | 0.9625         | 0.309 |
| Total Carbon     | Kansas           | First derivative + Vector normalization (SNV) | 0.984          | 0.44  |
| Inorganic Carbon | Colorado         | First derivative + Straight line subtraction  | 0.9899         | 0.834 |
| Inorganic Carbon | Wyoming          | First derivative                              | 0.9925         | 0.761 |
| Inorganic Carbon | Iowa or Nebraska | First derivative + MSC                        | 0.9768         | 1.56  |
| Inorganic Carbon | Kansas           | First derivative + Straight line subtraction  | 0.9959         | 0.798 |
| Organic Carbon   | Colorado         | First derivative + Vector normalization (SNV) | 0.963          | 0.398 |
| Organic Carbon   | Wyoming          | First derivative + Vector normalization (SNV) | 0.9604         | 0.318 |
| Organic Carbon   | Iowa or Nebraska | First derivative + Vector normalization (SNV) | 0.9553         | 0.318 |
| Organic Carbon   | Kansas           | First derivative + MSC                        | 0.9564         | 0.257 |

**Table S4:** The absolute difference ( $\Delta$ ) reported for % total carbon (TC), % soil inorganic carbon (SIC), and % soil organic carbon (SOC) for soil samples B, C, J, and D sent to the eight external service soil testing laboratories calculated by subtracting the field moist soil sample from the air-dried soil sample sent. The laboratories are identified by a roman numeral with the true directional difference reported in parentheses.

| Soil | Lab  | ( $\Delta$ TC)     | ( $\Delta$ SIC)    | ( $\Delta$ SOC)    |
|------|------|--------------------|--------------------|--------------------|
| B    | I    | 3.67, 4.07 (-0.40) | 0.45, 0.86 (-0.41) | 3.22, 3.21 (+0.01) |
| C    | I    | 1.23, 1.43 (-0.16) | 0.02, 0.16 (-0.14) | 1.25, 1.27 (-0.02) |
| J    | I    | 3.37, 3.37 (0.00)  | 0.09, 0.01 (+0.08) | 3.28, 3.36 (-0.08) |
| D    | I    | 1.55, 1.66 (-0.11) | 0.72, 0.83 (-0.11) | 0.83, 0.83 (0.00)  |
| B    | II   | 2.60, 2.73 (-0.13) | 0.54, 0.28 (+0.26) | 2.06, 2.45 (-0.39) |
| C    | II   | 1.11, 1.36 (-0.25) | 0.22, 0.32 (-0.10) | 0.89, 1.04 (-0.15) |
| J    | II   | 7.57, 2.95 (+4.62) | 4.12, 0.06 (+4.06) | 3.45, 2.89 (+0.56) |
| D    | II   | 1.45, 1.43 (+0.02) | 0.76, 0.60 (+0.07) | 0.77, 0.83 (-0.05) |
| B    | III  | 4.52, 2.63 (+1.89) | 0.46, 0.01 (+0.45) | 4.07, 2.62 (+1.45) |
| C    | III  | 1.32, 1.21 (+0.11) | 0.08, 0.06 (+0.02) | 1.24, 1.15 (+0.09) |
| J    | III  | 3.37, 3.16 (+0.21) | 0.00, 0.02 (-0.02) | 3.37, 3.13 (+0.24) |
| D    | III  | 1.53, 1.54 (-0.01) | 0.73, 0.74 (-0.01) | 0.80, 0.80 (0.00)  |
| B    | IV   | 6.51, 4.72 (+1.79) | 1.72, 0.59 (+1.13) | 4.79, 4.13 (+0.66) |
| C    | IV   | 1.22, 0.92 (+0.30) | 0.14, 0.00 (+0.14) | 1.08, 1.39 (-0.31) |
| J    | IV   | 2.99, 2.89 (+0.10) | 0.00, 0.00 (0.00)  | 3.38, 2.97 (+0.41) |
| D    | IV   | 1.66, 1.02 (-0.36) | 0.52, 1.41 (-0.89) | 1.14, 0.61 (+0.53) |
| B    | V    | 3.17, 2.94 (+0.23) | 0.56, 0.53 (+0.03) | 2.61, 2.40 (+0.21) |
| C    | V    | 1.34, 1.16 (+0.18) | 0.03, 0.03 (0.00)  | 1.32, 1.14 (+0.18) |
| J    | V    | 4.03, 3.67 (+0.36) | 0.04, 0.02 (+0.01) | 3.99, 3.65 (+0.35) |
| D    | V    | 1.53, 1.69 (-0.16) | 0.80, 0.80 (0.00)  | 0.73, 0.89 (-0.16) |
| B    | VI   | 2.98, 3.06 (-0.08) | 0.41, 0.40 (+0.01) | 2.57, 2.66 (-0.09) |
| C    | VI   | 1.24, 1.20 (+0.04) | 0.00, 0.00 (0.00)  | 1.24, 1.20 (+0.04) |
| J    | VI   | 3.34, 3.32 (+0.02) | 0.00, 0.00 (0.00)  | 3.34, 3.32 (+0.02) |
| D    | VI   | 1.52, 1.52 (0.00)  | 0.78, 0.06 (+0.72) | 0.74, 1.46 (-0.72) |
| B    | VII  | 3.03, 3.45 (-0.42) | 0.52, 0.94 (-0.42) | 2.51, 2.51 (0.00)  |
| C    | VII  | 1.31, 1.36 (-0.05) | 0.00, 0.00 (0.00)  | 1.31, 1.36 (-0.05) |
| J    | VII  | 3.36, 3.31 (+0.15) | 0.00, 0.00 (0.00)  | 3.36, 3.31 (+0.15) |
| D    | VII  | 1.71, 1.57 (+0.14) | 0.53, 0.52 (+0.01) | 1.18, 1.05 (+0.13) |
| B    | VIII | 4.08, 4.05 (+0.03) | 0.68, 1.03 (-0.35) | 3.40, 3.02 (+0.38) |
| C    | VIII | 1.25, 1.22 (+0.03) | 0.18, 0.29 (-0.11) | 1.07, 0.93 (+0.14) |
| J    | VIII | 3.25, 3.78 (-0.53) | 0.28, 0.17 (+0.11) | 2.97, 3.61 (-0.64) |
| D    | VIII | 1.54, 1.59 (-0.05) | 1.02, 1.19 (-0.17) | 0.52, 0.40 (+0.12) |

**Table S5:** Data averages and standard error for % plant material and % rocks removed for each sieving procedure, including R (8 + 2 mm), S1 (4 mm), S2 (2 mm with rolling pin), and S3 (mechanical grinder) as described in Figure 1 of the main text. Significance by ANOVA is indicated by asterisks (\*). Soils are lettered and significant differences for each soil (S)\*procedure (P) combination are indicated by the superscript

|                  | Method Test | Procedure | Procedure ID | A                               | B                              | C                               | D                              | E                               | F                               | G                               | H                               | I                               | J                              | K                              | L                               | Significance levels |
|------------------|-------------|-----------|--------------|---------------------------------|--------------------------------|---------------------------------|--------------------------------|---------------------------------|---------------------------------|---------------------------------|---------------------------------|---------------------------------|--------------------------------|--------------------------------|---------------------------------|---------------------|
| % plant material | Sieving     | 8+2 mm    | R            | 0.22<br>±<br>0.03 <sup>A</sup>  | 0.35<br>±<br>0.04 <sup>A</sup> | 0.31<br>±<br>0.05 <sup>A</sup>  | 0.04<br>±<br>0.01 <sup>A</sup> | 0.25<br>±<br>0.04 <sup>A</sup>  | 0.15<br>±<br>0.02 <sup>A</sup>  | 0.38<br>±<br>0.03 <sup>A</sup>  | 0.99<br>±<br>0.04 <sup>A</sup>  | 0.12<br>±<br>0.03 <sup>A</sup>  | 0.04<br>±<br>0.01 <sup>A</sup> | 0.04<br>±<br>0.01 <sup>A</sup> | 0.05<br>±<br>0.02 <sup>A</sup>  | S<br>***            |
|                  |             | 4 mm      | S1           | 0.26<br>±<br>0.04 <sup>A</sup>  | 0.34<br>±<br>0.05 <sup>A</sup> | 0.28<br>±<br>0.07 <sup>A</sup>  | 0.08<br>±<br>0.05 <sup>A</sup> | 0.12<br>±<br>0.01 <sup>AB</sup> | 0.09<br>±<br>0.02 <sup>AC</sup> | 0.29<br>±<br>0.03 <sup>AC</sup> | 0.92<br>±<br>0.17 <sup>A</sup>  | 0.07<br>±<br>0.05 <sup>AC</sup> | 0.13<br>±<br>0.08 <sup>A</sup> | 0.03<br>±<br>0.01 <sup>A</sup> | 0.05<br>±<br>0.05 <sup>A</sup>  | P<br>***            |
|                  |             | 2 mm      | S2           | 0.17<br>±<br>0.03 <sup>A</sup>  | 0.34<br>±<br>0.11 <sup>A</sup> | 0.15<br>±<br>0.04 <sup>AB</sup> | 0.11<br>±<br>0.08 <sup>A</sup> | 0.03<br>±<br>0.01 <sup>B</sup>  | 0.01<br>±<br>0.01 <sup>BC</sup> | 0.13<br>±<br>0.03 <sup>BC</sup> | 1.15<br>±<br>0.14 <sup>A</sup>  | 0.01<br>±<br>0.01 <sup>BC</sup> | 0.05<br>±<br>0.03 <sup>A</sup> | 0.01<br>±<br>0.01 <sup>A</sup> | 0.02<br>±<br>0.02 <sup>A</sup>  | S*P<br>**           |
|                  |             | Grinder   | S3           | 0.12<br>±<br>0.03 <sup>A</sup>  | 0.12<br>±<br>0.04 <sup>B</sup> | 0.06<br>±<br>0.02 <sup>B</sup>  | 0.02<br>±<br>0.01 <sup>A</sup> | 0.05<br>±<br>0.02 <sup>B</sup>  | 0.01<br>±<br>0.01 <sup>B</sup>  | 0.07<br>±<br>0.02 <sup>B</sup>  | 0.33<br>±<br>0.12 <sup>B</sup>  | 0.04<br>±<br>0.04 <sup>BC</sup> | 0.09<br>±<br>0.09 <sup>A</sup> | 0 ± 0<br><sup>A</sup>          | 0 ± 0<br><sup>A</sup>           |                     |
| % rocks          | Sieving     | 8+2 mm    | R            | 1.13<br>±<br>0.15 <sup>AC</sup> | 0.31<br>±<br>0.13 <sup>A</sup> | 4.73<br>±<br>0.58 <sup>A</sup>  | 0.13<br>±<br>0.05 <sup>A</sup> | 0.14<br>±<br>0.14 <sup>A</sup>  | 4.1 ±<br>0.68 <sup>A</sup>      | 0.85<br>±<br>0.09 <sup>A</sup>  | 12.02<br>±<br>0.79 <sup>A</sup> | 0.03<br>±<br>0.02 <sup>A</sup>  | 0.07<br>±<br>0.04 <sup>A</sup> | 1.14<br>±<br>0.56 <sup>B</sup> | 0.98<br>±<br>0.22 <sup>A</sup>  | S<br>***            |
|                  |             | 4 mm      | S1           | 0.32<br>±<br>0.14 <sup>BC</sup> | 0.21<br>±<br>0.13 <sup>A</sup> | 2.03<br>±<br>0.45 <sup>B</sup>  | 0.16<br>±<br>0.07 <sup>A</sup> | 0 ± 0<br><sup>A</sup>           | 2.89<br>±<br>0.43 <sup>A</sup>  | 0.13<br>±<br>0.08 <sup>B</sup>  | 5.78<br>±<br>0.54 <sup>B</sup>  | 0 ± 0<br><sup>A</sup>           | 0 ± 0<br><sup>A</sup>          | 0.57<br>±<br>0.2 <sup>B</sup>  | 0.23<br>±<br>0.04 <sup>AB</sup> | P<br>***            |
|                  |             | 2 mm      | S2           | 1.81<br>±<br>0.54 <sup>A</sup>  | 0.11<br>±<br>0.06 <sup>A</sup> | 5.64<br>±<br>0.53 <sup>A</sup>  | 0.31<br>±<br>0.12 <sup>A</sup> | 0 ± 0<br><sup>A</sup>           | 4.06<br>±<br>0.6 <sup>A</sup>   | 0.73<br>±<br>0.24 <sup>AC</sup> | 14.38<br>±<br>1.34 <sup>A</sup> | 0.03<br>±<br>0.02 <sup>A</sup>  | 0.04<br>±<br>0.04 <sup>A</sup> | 3.78<br>±<br>1.93 <sup>A</sup> | 0.8 ±<br>0.15 <sup>A</sup>      | S*P<br>***          |
|                  |             | Grinder   | S3           | 0.33<br>±<br>0.25 <sup>B</sup>  | 0 ± 0<br><sup>A</sup>          | 2.28<br>±<br>1.26 <sup>B</sup>  | 0.39<br>±<br>0.29 <sup>A</sup> | 0 ± 0<br><sup>A</sup>           | 2.32<br>±<br>0.48 <sup>A</sup>  | 0.21<br>±<br>0.14 <sup>BC</sup> | 11.58<br>±<br>0.98 <sup>A</sup> | 0 ± 0<br><sup>A</sup>           | 0 ± 0<br><sup>A</sup>          | 0.72<br>±<br>0.61 <sup>B</sup> | 0 ± 0<br><sup>B</sup>           |                     |

**Table S6:** Data averages and standard error for % total carbon (TC) for each sieving, grinding, and drying procedure as described in Figure 1 of the main text. Significance by ANOVA is indicated by asterisks (\*). Soils are lettered and significant differences for each soil (S)\*procedure (P) combination are indicated by the superscript.

|                  | Method Test          | Procedure    | Procedure ID | A                              | B                              | C                               | D                              | E                              | F                              | G                               | H                              | I                              | J                              | K                               | L                               | Significance levels |
|------------------|----------------------|--------------|--------------|--------------------------------|--------------------------------|---------------------------------|--------------------------------|--------------------------------|--------------------------------|---------------------------------|--------------------------------|--------------------------------|--------------------------------|---------------------------------|---------------------------------|---------------------|
| <b>% Total C</b> | <b>Sieving</b>       | 8+2 mm       | R            | 4.26<br>±<br>0.14 <sup>A</sup> | 3.11<br>±<br>0.16 <sup>A</sup> | 1.31<br>±<br>0.04 <sup>A</sup>  | 1.7 ±<br>0.02 <sup>A</sup>     | 1.1 ±<br>0.02 <sup>A</sup>     | 1.07<br>±<br>0.02 <sup>A</sup> | 1.38<br>±<br>0.04 <sup>A</sup>  | 7.21<br>±<br>0.02 <sup>A</sup> | 1.41<br>±<br>0.05 <sup>A</sup> | 3.3 ±<br>0.07 <sup>A</sup>     | 2.5 ±<br>0.09 <sup>A</sup>      | 2.98<br>±<br>0.13 <sup>AB</sup> | S<br>***            |
|                  |                      | 4 mm         | S1           | 4.31<br>±<br>0.15 <sup>A</sup> | 3.35<br>±<br>0.31 <sup>A</sup> | 1.27<br>±<br>0.04 <sup>A</sup>  | 1.68<br>±<br>0.02 <sup>A</sup> | 1.13<br>±<br>0.03 <sup>A</sup> | 1.02<br>±<br>0.01 <sup>A</sup> | 1.33<br>±<br>0.03 <sup>AB</sup> | 7.05<br>±<br>0.06 <sup>A</sup> | 1.4 ±<br>0.04 <sup>A</sup>     | 3.23<br>±<br>0.03 <sup>A</sup> | 2.55<br>±<br>0.05 <sup>A</sup>  | 3.19<br>±<br>0.08 <sup>A</sup>  | P<br>***            |
|                  |                      | 2 mm         | S2           | 4.39<br>±<br>0.08 <sup>A</sup> | 3.09<br>±<br>0.08 <sup>A</sup> | 1.31<br>±<br>0.03 <sup>A</sup>  | 1.69<br>±<br>0.01 <sup>A</sup> | 1.09<br>±<br>0.02 <sup>A</sup> | 1.02<br>±<br>0.01 <sup>A</sup> | 1.32<br>±<br>0.03 <sup>AB</sup> | 7.28<br>±<br>0.15 <sup>A</sup> | 1.42<br>±<br>0.02 <sup>A</sup> | 3.38<br>±<br>0.09 <sup>A</sup> | 2.44<br>±<br>0.09 <sup>AB</sup> | 3.05<br>±<br>0.07 <sup>A</sup>  | S*P<br>*            |
|                  |                      | Grinder      | S3           | 4.15<br>±<br>0.26 <sup>A</sup> | 3.3 ±<br>0.21 <sup>A</sup>     | 1.31<br>±<br>0.02 <sup>A</sup>  | 1.62<br>±<br>0.02 <sup>A</sup> | 1.07<br>±<br>0.03 <sup>A</sup> | 0.88<br>±<br>0.04 <sup>B</sup> | 1.2 ±<br>0.07 <sup>B</sup>      | 7.05<br>±<br>0.37 <sup>A</sup> | 1.46<br>±<br>0.07 <sup>A</sup> | 3.48<br>±<br>0.24 <sup>A</sup> | 2.2 ±<br>0.05 <sup>B</sup>      | 2.7 ±<br>0.12 <sup>B</sup>      |                     |
|                  | <b>Fine grinding</b> | Roller Table | R            | 4.26<br>±<br>0.14 <sup>A</sup> | 3.11<br>±<br>0.16 <sup>A</sup> | 1.31<br>±<br>0.04 <sup>A</sup>  | 1.7 ±<br>0.02 <sup>A</sup>     | 1.1 ±<br>0.02 <sup>A</sup>     | 1.07<br>±<br>0.02 <sup>A</sup> | 1.38<br>±<br>0.04 <sup>A</sup>  | 7.21<br>±<br>0.02 <sup>A</sup> | 1.41<br>±<br>0.05 <sup>A</sup> | 3.3 ±<br>0.07 <sup>A</sup>     | 2.5 ±<br>0.09 <sup>A</sup>      | 2.98<br>±<br>0.13 <sup>A</sup>  | S<br>***            |
|                  |                      | Ball mill    | G1           | 4.17<br>±<br>0.05 <sup>A</sup> | 3 ±<br>0.17 <sup>A</sup>       | 1.19<br>±<br>0.02 <sup>B</sup>  | 1.71<br>±<br>0.01 <sup>A</sup> | 1.1 ±<br>0.01 <sup>A</sup>     | 0.98<br>±<br>0.01 <sup>B</sup> | 1.22<br>±<br>0.02 <sup>B</sup>  | 7.37<br>±<br>0.04 <sup>A</sup> | 1.38<br>±<br>0.02 <sup>A</sup> | 3.37<br>±<br>0.06 <sup>A</sup> | 2.16<br>±<br>0.02 <sup>B</sup>  | 2.71<br>±<br>0.02 <sup>B</sup>  | P<br>***            |
|                  |                      | None         | G2           | 3.73<br>±<br>0.06 <sup>B</sup> | 3.12<br>±<br>0.24 <sup>A</sup> | 1.28<br>±<br>0.03 <sup>AB</sup> | 1.63<br>±<br>0.03 <sup>A</sup> | 1.14<br>±<br>0.07 <sup>A</sup> | 0.95<br>±<br>0.02 <sup>B</sup> | 1.35<br>±<br>0.03 <sup>A</sup>  | 7.11<br>±<br>0.17 <sup>A</sup> | 1.36<br>±<br>0.03 <sup>A</sup> | 3.16<br>±<br>0.11 <sup>A</sup> | 2.12<br>±<br>0.07 <sup>B</sup>  | 2.71<br>±<br>0.12 <sup>B</sup>  | S*P<br>***          |
|                  | <b>Drying</b>        | 105 C        | R            | 4.26<br>±<br>0.14 <sup>A</sup> | 3.11<br>±<br>0.16 <sup>A</sup> | 1.31<br>±<br>0.04 <sup>A</sup>  | 1.7 ±<br>0.02 <sup>A</sup>     | 1.1 ±<br>0.02 <sup>A</sup>     | 1.07<br>±<br>0.02 <sup>A</sup> | 1.38<br>±<br>0.04 <sup>AB</sup> | 7.21<br>±<br>0.02 <sup>A</sup> | 1.41<br>±<br>0.05 <sup>A</sup> | 3.3 ±<br>0.07 <sup>A</sup>     | 2.5 ±<br>0.09 <sup>A</sup>      | 2.98<br>±<br>0.13 <sup>A</sup>  | S<br>***            |
|                  |                      | 60 C         | D1           | 4.38<br>±<br>0.08 <sup>A</sup> | 3.11<br>±<br>0.09 <sup>A</sup> | 1.2 ±<br>0.03 <sup>A</sup>      | 1.7 ±<br>0.02 <sup>A</sup>     | 1.08<br>±<br>0.02 <sup>A</sup> | 1.01<br>±<br>0.01 <sup>A</sup> | 1.5 ±<br>0.04 <sup>A</sup>      | 7.09<br>±<br>0.03 <sup>A</sup> | 1.42<br>±<br>0.03 <sup>A</sup> | 3.17<br>±<br>0.06 <sup>A</sup> | 2.36<br>±<br>0.08 <sup>A</sup>  | 3.22<br>±<br>0.15 <sup>A</sup>  | P<br>**             |
|                  |                      | air-dried    | D2           | 4.08<br>±<br>0.13 <sup>A</sup> | 2.86<br>±<br>0.15 <sup>A</sup> | 1.3 ±<br>0.04 <sup>A</sup>      | 1.63<br>±<br>0.04 <sup>A</sup> | 1.08<br>±<br>0.03 <sup>A</sup> | 1.02<br>±<br>0.03 <sup>A</sup> | 1.35<br>±<br>0.1 <sup>B</sup>   | 7.07<br>±<br>0.06 <sup>A</sup> | 1.43<br>±<br>0.02 <sup>A</sup> | 3.11<br>±<br>0.07 <sup>A</sup> | 2.34<br>±<br>0.06 <sup>A</sup>  | 3.01<br>±<br>0.13 <sup>A</sup>  | S*P<br>.            |

**Table S7:** Data averages and standard error for % soil inorganic carbon (SIC) for each sieving, grinding, and drying procedure as described in Figure 1 of the main text. Significance by ANOVA is indicated by asterisks (\*). Soils are lettered and significant differences for each soil (S)\*procedure (P) combination are indicated by the superscript.

|              | Method Test          | Procedure    | Procedure ID | A                              | B                              | C  | D                              | E  | F  | G  | H                              | I  | J  | K                              | L                            | Significance levels |
|--------------|----------------------|--------------|--------------|--------------------------------|--------------------------------|----|--------------------------------|----|----|----|--------------------------------|----|----|--------------------------------|------------------------------|---------------------|
| <b>% SIC</b> | <b>Sieving</b>       | 8+2 mm       | R            | 0.68<br>±<br>0.02 <sup>A</sup> | 0.56<br>±<br>0.05 <sup>A</sup> | NA | 0.86<br>±<br>0.01 <sup>A</sup> | NA | NA | NA | 4.86<br>±<br>0.19 <sup>A</sup> | NA | NA | 0.17<br>±<br>0 <sup>A</sup>    | 0.43 ±<br>0.04 <sup>A</sup>  | S<br>***            |
|              |                      | 4 mm         | S1           | 0.72<br>±<br>0.03 <sup>A</sup> | 0.65<br>±<br>0.02 <sup>A</sup> | NA | 0.86<br>±<br>0.01 <sup>A</sup> | NA | NA | NA | 4.6 ±<br>0.08 <sup>A</sup>     | NA | NA | 0.16<br>±<br>0.02 <sup>A</sup> | 0.49 ±<br>0.01 <sup>A</sup>  | P<br>*              |
|              |                      | 2 mm         | S2           | 0.77<br>±<br>0.03 <sup>A</sup> | 0.66<br>±<br>0.02 <sup>A</sup> | NA | 0.92<br>±<br>0.01 <sup>A</sup> | NA | NA | NA | 4.73<br>±<br>0.22 <sup>A</sup> | NA | NA | 0.18<br>±<br>0.01 <sup>A</sup> | 0.53 ±<br>0.02 <sup>A</sup>  | S*P                 |
|              |                      | Grinder      | S3           | 0.67<br>±<br>0.04 <sup>A</sup> | 0.63<br>±<br>0.01 <sup>A</sup> | NA | 0.84<br>±<br>0.01 <sup>A</sup> | NA | NA | NA | 5.2 ±<br>0.18 <sup>A</sup>     | NA | NA | 0.17<br>±<br>0.01 <sup>A</sup> | 0.52 ±<br>0.04 <sup>A</sup>  |                     |
|              | <b>Fine grinding</b> | Roller Table | R            | 0.68<br>±<br>0.02 <sup>A</sup> | 0.56<br>±<br>0.05 <sup>A</sup> | NA | 0.86<br>±<br>0.01 <sup>A</sup> | NA | NA | NA | 4.86<br>±<br>0.19 <sup>A</sup> | NA | NA | 0.17<br>±<br>0 <sup>AB</sup>   | 0.43 ±<br>0.04 <sup>A</sup>  | S                   |
|              |                      | Ball mill    | G1           | 0.68<br>±<br>0.03 <sup>A</sup> | 0.63<br>±<br>0.01 <sup>A</sup> | NA | 0.86<br>±<br>0.01 <sup>A</sup> | NA | NA | NA | 4.73<br>±<br>0.05 <sup>A</sup> | NA | NA | 0.2 ±<br>0.01 <sup>A</sup>     | 0.48 ±<br>0.01 <sup>A</sup>  | P                   |
|              |                      | None         | G2           | 0.68<br>±<br>0.02 <sup>A</sup> | 0.63<br>±<br>0.04 <sup>A</sup> | NA | 0.83<br>±<br>0.01 <sup>A</sup> | NA | NA | NA | 4.85<br>±<br>0.22 <sup>A</sup> | NA | NA | 0.17<br>±<br>0.03 <sup>B</sup> | 0.47 ±<br>0.01 <sup>A</sup>  | S*P                 |
|              | <b>Drying</b>        | 105 C        | R            | 0.68<br>±<br>0.02 <sup>A</sup> | 0.56<br>±<br>0.05 <sup>A</sup> | NA | 0.86<br>±<br>0.01 <sup>A</sup> | NA | NA | NA | 4.86<br>±<br>0.19 <sup>A</sup> | NA | NA | 0.17<br>±<br>0 <sup>AB</sup>   | 0.43 ±<br>0.04 <sup>B</sup>  | S<br>***            |
|              |                      | 60 C         | D1           | 0.76<br>±<br>0.03 <sup>A</sup> | 0.65<br>±<br>0.01 <sup>A</sup> | NA | 0.91<br>±<br>0.02 <sup>A</sup> | NA | NA | NA | 5.07<br>±<br>0.09 <sup>A</sup> | NA | NA | 0.19<br>±<br>0.02 <sup>A</sup> | 0.54 ±<br>0.02 <sup>A</sup>  | P<br>***            |
|              |                      | air-dried    | D2           | 0.73<br>±<br>0.03 <sup>A</sup> | 0.63<br>±<br>0.02              | NA | 0.9 ±<br>0.01 <sup>A</sup>     | NA | NA | NA | 4.9 ±<br>0.12 <sup>A</sup>     | NA | NA | 0.15<br>±<br>0.02 <sup>B</sup> | 0.46 ±<br>0.02 <sup>AB</sup> | S*P                 |



**Table S8:** Data averages and standard error for % soil organic carbon (SOC) for each sieving, grinding, and drying procedure as described in Figure 1 of the main text. Significance by ANOVA is indicated by asterisks (\*). Soils are lettered and significant differences for each soil (S)\*procedure (P)combination are indicated by the superscript.

|       | Method Test   | Procedure    | Procedure ID | A                         | B                         | C                        | D                         | E                        | F                         | G                         | H                         | I                        | J                        | K                        | L                         | Significance levels |
|-------|---------------|--------------|--------------|---------------------------|---------------------------|--------------------------|---------------------------|--------------------------|---------------------------|---------------------------|---------------------------|--------------------------|--------------------------|--------------------------|---------------------------|---------------------|
| SOC % | Sieving       | 8+2 mm       | R            | 3.58 ± 0.12 <sup>A</sup>  | 2.55 ± 0.2 <sup>A</sup>   | 1.31 ± 0.04 <sup>A</sup> | 0.85 ± 0.02 <sup>A</sup>  | 1.1 ± 0.02 <sup>A</sup>  | 1.07 ± 0.02 <sup>A</sup>  | 1.38 ± 0.04 <sup>A</sup>  | 2.34 ± 0.2 <sup>A</sup>   | 1.41 ± 0.05 <sup>A</sup> | 3.3 ± 0.07 <sup>A</sup>  | 2.33 ± 0.08 <sup>A</sup> | 2.55 ± 0.12 <sup>AB</sup> | S ***               |
|       |               | 4 mm         | S1           | 3.6 ± 0.15 <sup>A</sup>   | 2.7 ± 0.33 <sup>A</sup>   | 1.27 ± 0.04 <sup>A</sup> | 0.82 ± 0.02 <sup>A</sup>  | 1.13 ± 0.03 <sup>A</sup> | 1.02 ± 0.01 <sup>A</sup>  | 1.33 ± 0.03 <sup>A</sup>  | 2.46 ± 0.13 <sup>A</sup>  | 1.4 ± 0.04 <sup>A</sup>  | 3.23 ± 0.03 <sup>A</sup> | 2.39 ± 0.05 <sup>A</sup> | 2.7 ± 0.08 <sup>A</sup>   | P **                |
|       |               | 2 mm         | S2           | 3.62 ± 0.06 <sup>A</sup>  | 2.43 ± 0.09 <sup>A</sup>  | 1.31 ± 0.03 <sup>A</sup> | 0.77 ± 0.02 <sup>A</sup>  | 1.09 ± 0.02 <sup>A</sup> | 1.02 ± 0.01 <sup>A</sup>  | 1.32 ± 0.03 <sup>A</sup>  | 2.55 ± 0.33 <sup>A</sup>  | 1.42 ± 0.02 <sup>A</sup> | 3.38 ± 0.09 <sup>A</sup> | 2.26 ± 0.09 <sup>A</sup> | 2.52 ± 0.07 <sup>AB</sup> | S*P                 |
|       |               | Grinder      | S3           | 3.48 ± 0.28 <sup>A</sup>  | 2.67 ± 0.21 <sup>A</sup>  | 1.31 ± 0.02 <sup>A</sup> | 0.78 ± 0.02 <sup>A</sup>  | 1.07 ± 0.03 <sup>A</sup> | 0.88 ± 0.04 <sup>A</sup>  | 1.2 ± 0.07 <sup>A</sup>   | 1.86 ± 0.45 <sup>B</sup>  | 1.46 ± 0.07 <sup>A</sup> | 3.48 ± 0.24 <sup>A</sup> | 2.03 ± 0.05 <sup>A</sup> | 2.18 ± 0.1 <sup>B</sup>   |                     |
|       | Fine grinding | Roller Table | R            | 3.58 ± 0.12 <sup>A</sup>  | 2.55 ± 0.2 <sup>A</sup>   | 1.31 ± 0.04 <sup>A</sup> | 0.85 ± 0.02 <sup>A</sup>  | 1.1 ± 0.02 <sup>A</sup>  | 1.07 ± 0.02 <sup>A</sup>  | 1.38 ± 0.04 <sup>A</sup>  | 2.34 ± 0.2 <sup>B</sup>   | 1.41 ± 0.05 <sup>A</sup> | 3.3 ± 0.07 <sup>A</sup>  | 2.33 ± 0.08 <sup>A</sup> | 2.55 ± 0.12 <sup>A</sup>  | S ***               |
|       |               | Ball mill    | G1           | 3.49 ± 0.07 <sup>AC</sup> | 2.37 ± 0.18 <sup>A</sup>  | 1.19 ± 0.02 <sup>A</sup> | 0.85 ± 0.02 <sup>A</sup>  | 1.1 ± 0.01 <sup>A</sup>  | 0.98 ± 0.01 <sup>AB</sup> | 1.22 ± 0.02 <sup>B</sup>  | 2.64 ± 0.04 <sup>A</sup>  | 1.38 ± 0.02 <sup>A</sup> | 3.37 ± 0.06 <sup>A</sup> | 1.95 ± 0.02 <sup>B</sup> | 2.23 ± 0.02 <sup>B</sup>  | P ***               |
|       |               | None         | G2           | 3.05 ± 0.06 <sup>BC</sup> | 2.49 ± 0.26 <sup>A</sup>  | 1.28 ± 0.03 <sup>A</sup> | 0.8 ± 0.04 <sup>A</sup>   | 1.14 ± 0.07 <sup>A</sup> | 0.95 ± 0.02 <sup>B</sup>  | 1.35 ± 0.03 <sup>AB</sup> | 2.26 ± 0.24 <sup>B</sup>  | 1.36 ± 0.03 <sup>A</sup> | 3.16 ± 0.11 <sup>A</sup> | 1.95 ± 0.06 <sup>B</sup> | 2.23 ± 0.11 <sup>B</sup>  | S*P ***             |
|       | Drying        | 105 C        | R            | 3.58 ± 0.12 <sup>A</sup>  | 2.55 ± 0.2 <sup>A</sup>   | 1.31 ± 0.04 <sup>A</sup> | 0.85 ± 0.02 <sup>A</sup>  | 1.1 ± 0.02 <sup>A</sup>  | 1.07 ± 0.02 <sup>A</sup>  | 1.38 ± 0.04 <sup>AB</sup> | 2.34 ± 0.2 <sup>A</sup>   | 1.41 ± 0.05 <sup>A</sup> | 3.3 ± 0.07 <sup>A</sup>  | 2.33 ± 0.08 <sup>A</sup> | 2.55 ± 0.12 <sup>A</sup>  | S ***               |
|       |               | 60 C         | D1           | 3.62 ± 0.07 <sup>A</sup>  | 2.46 ± 0.09 <sup>AB</sup> | 1.2 ± 0.03 <sup>A</sup>  | 0.79 ± 0.04 <sup>AB</sup> | 1.08 ± 0.02 <sup>A</sup> | 1.01 ± 0.01 <sup>A</sup>  | 1.5 ± 0.04 <sup>A</sup>   | 2.02 ± 0.1 <sup>B</sup>   | 1.42 ± 0.03 <sup>A</sup> | 3.17 ± 0.06 <sup>A</sup> | 2.17 ± 0.08 <sup>A</sup> | 2.68 ± 0.14 <sup>A</sup>  | P ***               |
|       |               | air-dried    | D2           | 3.35 ± 0.14 <sup>A</sup>  | 2.23 ± 0.17 <sup>B</sup>  | 1.3 ± 0.04 <sup>A</sup>  | 0.73 ± 0.04 <sup>B</sup>  | 1.08 ± 0.03 <sup>A</sup> | 1.02 ± 0.03 <sup>A</sup>  | 1.35 ± 0.1 <sup>B</sup>   | 2.17 ± 0.16 <sup>AB</sup> | 1.43 ± 0.02 <sup>A</sup> | 3.11 ± 0.07 <sup>A</sup> | 2.18 ± 0.05 <sup>A</sup> | 2.54 ± 0.14 <sup>A</sup>  | S*P .               |

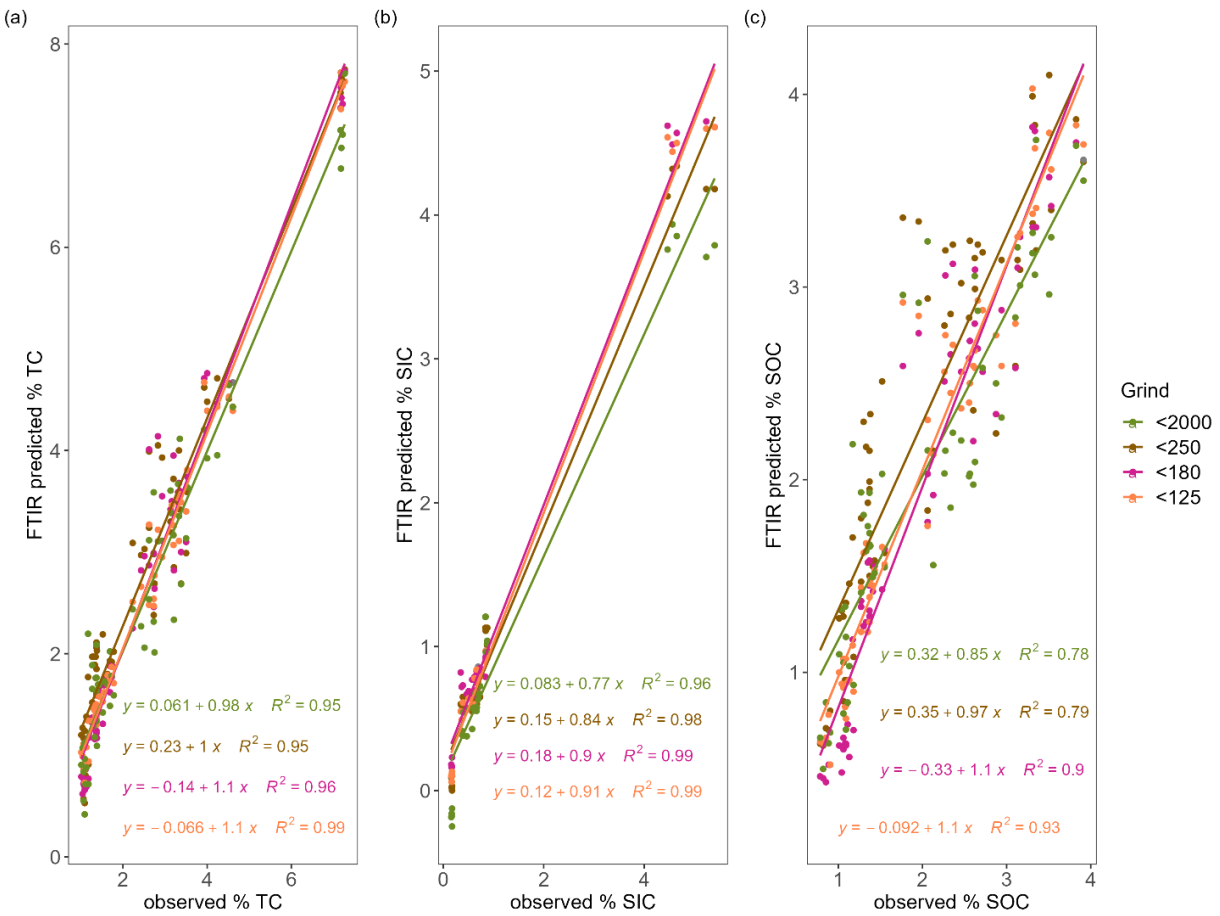

**Figure S1:** Fine grinding comparisons for predictions of % soil total carbon (TC) panel a, % soil inorganic carbon (SIC) panel b, and % soil organic carbon (SOC) panel c using Fourier transformed infrared spectroscopy (FTIR) where the FTIR predicted values are regressed against the observed values using dry combustion by an Elemental Analyzer for % TC, a pressure transducer for % SIC, and % SOC is calculated by % TC - % SIC. The units for grind size are in  $\mu\text{m}$ . All p-values are  $< 0.001$ .

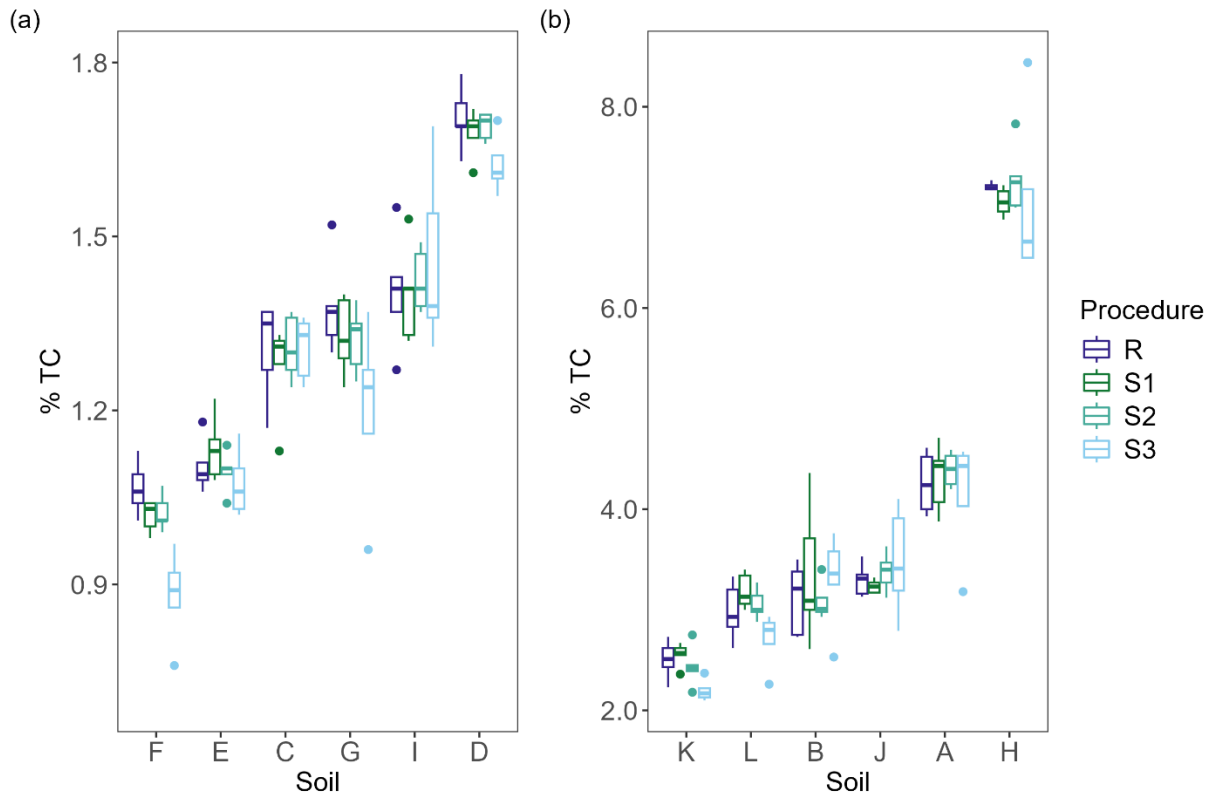

**Figure S2:** The % total carbon (TC) distribution shown with a boxplot for R (8 + 2 mm), S1 (4 mm), S2 (2 mm with rolling pin), and S3 (mechanical grinder) sieving procedures. Box plots report the median, first and third quartiles. Whiskers extend to the upper and lower data point that are within 1.5 times the interquartile range. Panel a (left) represents the soils with % TC between 0 and 2 %; Panel b (right) represents the soils with % TC between 2 and 8 %.

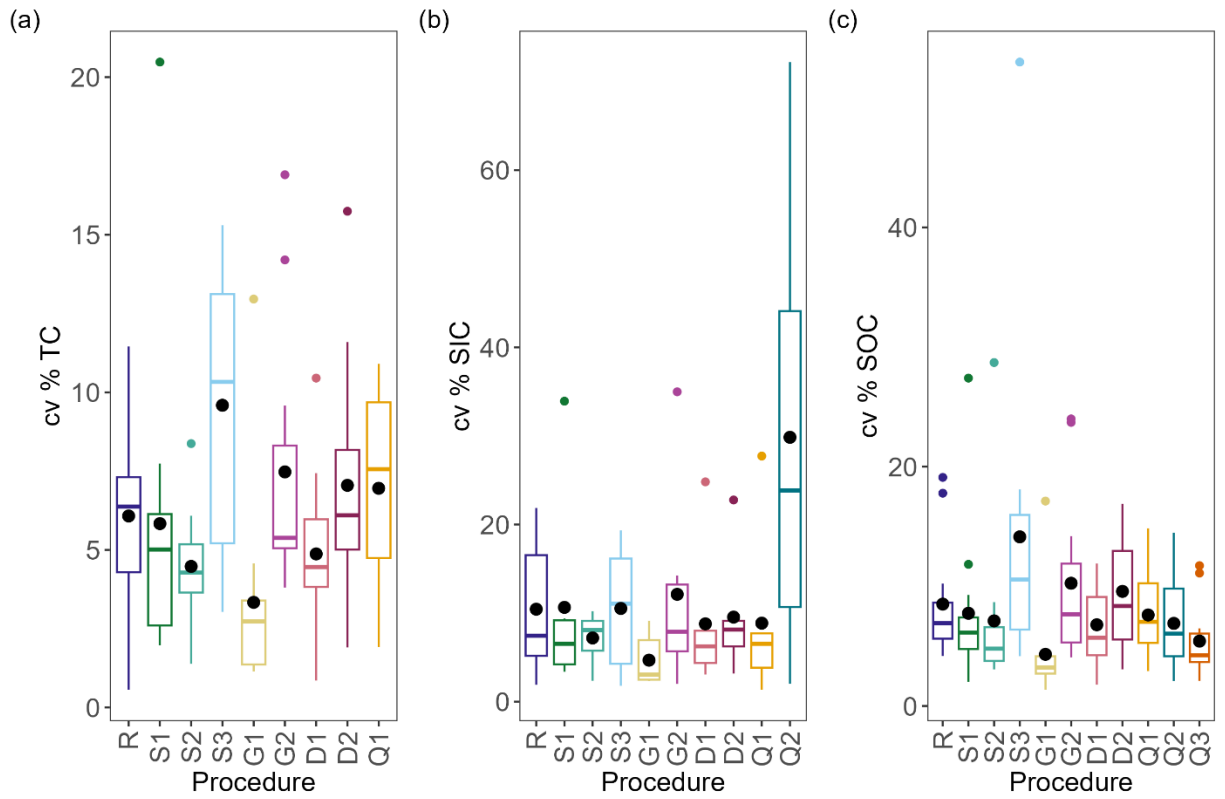

**Figure S3:** The distribution of the coefficient of variance (CV) across soils for all soil processing and quantification methods for % total carbon (TC; R-Q1; panel a), % soil inorganic carbon (SIC; R-Q2; panel b), and % soil organic carbon (SOC; P0-Q3; panel c) for all procedures described in Figure 1. Box plots report the median, first and third quartiles. Whiskers extend to the upper and lower data point that are within 1.5 times the interquartile range.

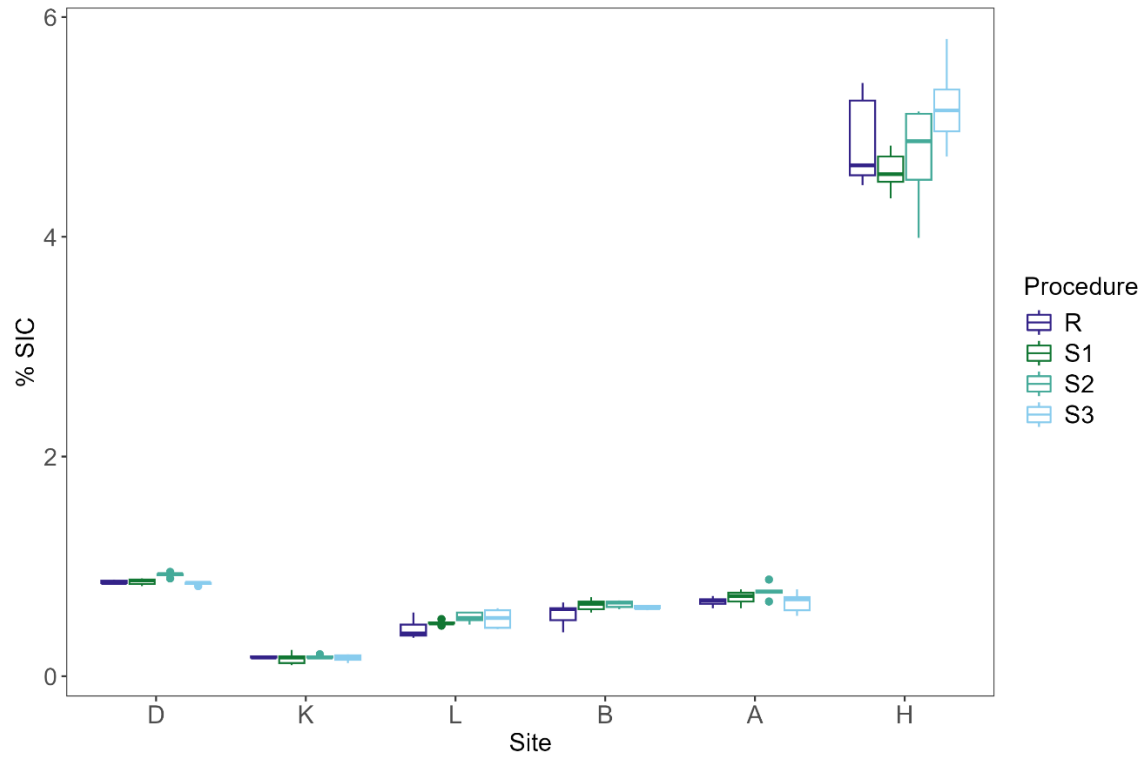

**Figure S4:** The % soil inorganic carbon (SIC) distribution shown with a boxplot for R (8 + 2 mm), S1 (4 mm), S2 (2 mm with rolling pin), and S3 (mechanical grinder) sieving procedures for each soil with SIC. Box plots report the median, first and third quartiles. Whiskers extend to the upper and lower data point that are within 1.5 times the interquartile range.

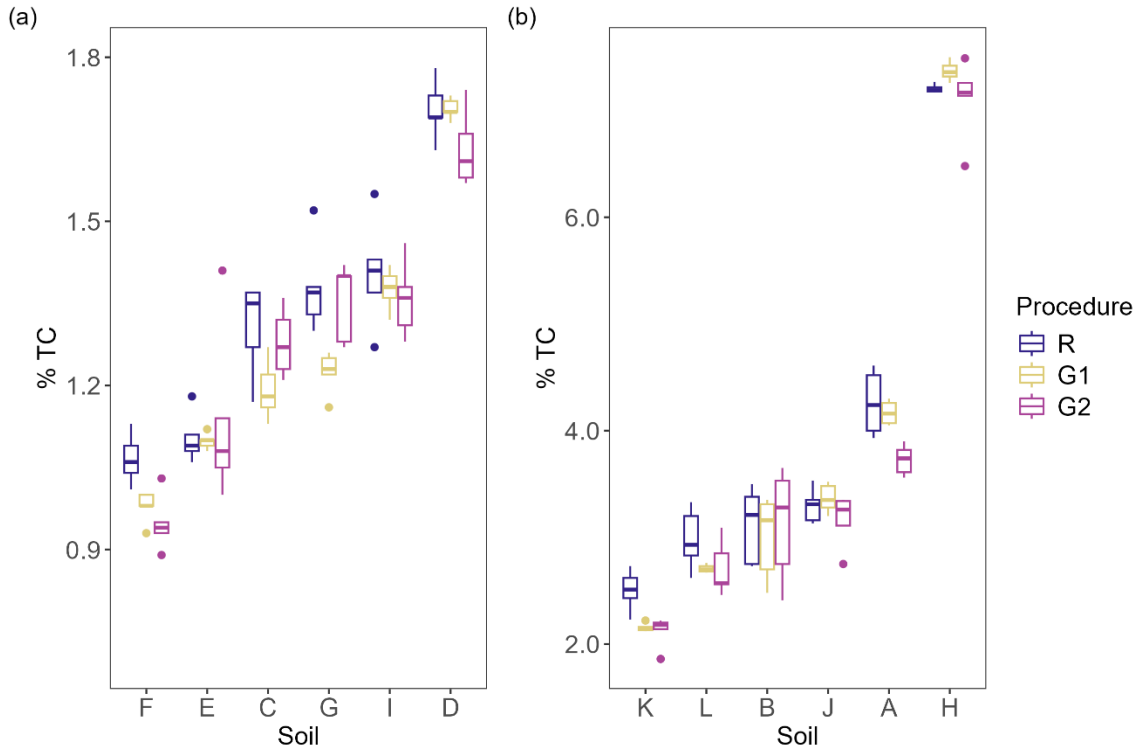

**Figure S5:** The % total C (TC) distribution shown with a boxplot for R (roller table grind to <math>< 250 \mu\text{m}</math>), G1 (ball mill to <math>< 125 \mu\text{m}</math>), and G2 (no grind; <math>< 2000 \mu\text{m}</math>) grinding procedures. Panel a (left) represents the soils with % TC between 0 and 2 %; Panel b (right) represents the soils with % TC between 2 and 8 %. Box plots report the median, first and third quartiles. Whiskers extend to the upper and lower data point that are within 1.5 times the interquartile range.

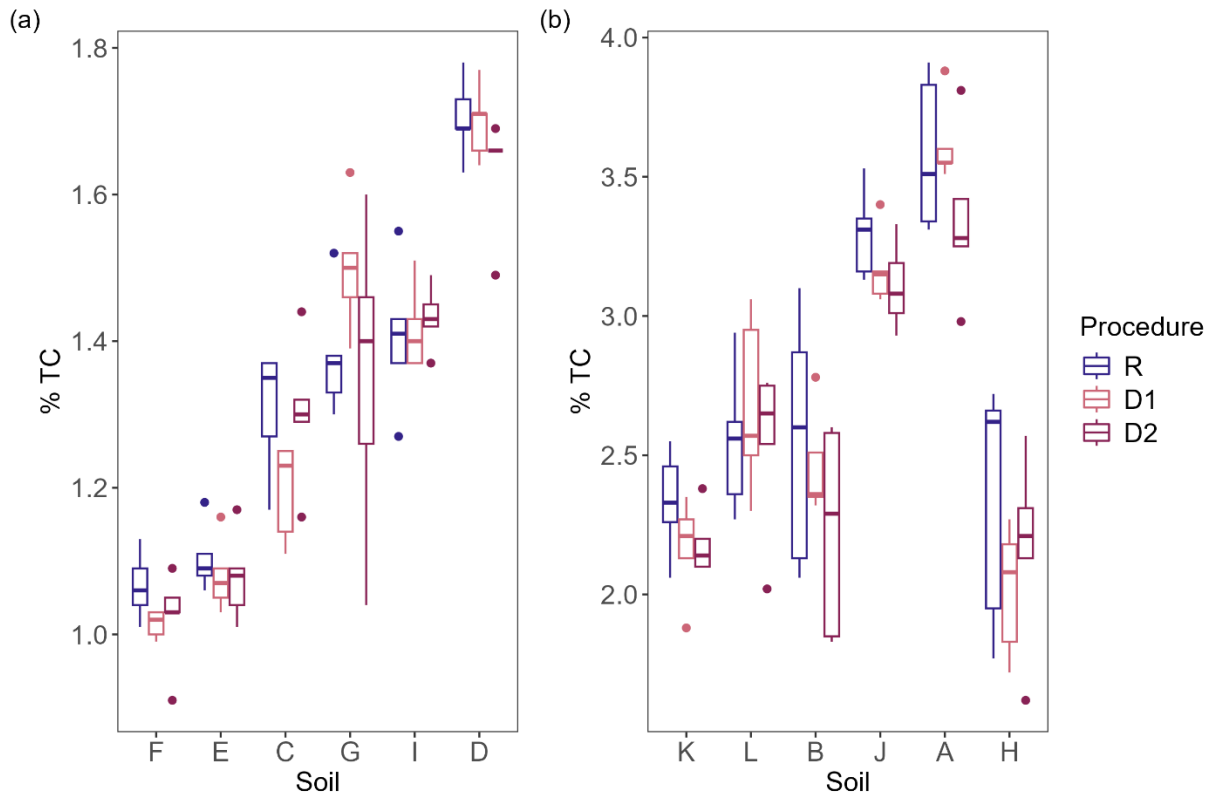

**Figure S6:** The % total C (TC) distribution shown with a boxplot for r (105 °C), D1 (60 °C), and D2 (air-dried only) drying procedures. Panel a (left) represents the soils with % TC between 0 and 2 %; Panel b (right) represents the soils with % TC between 2 and 8 %. Box plots report the median, first and third quartiles. Whiskers extend to the upper and lower data point that are within 1.5 times the interquartile range.

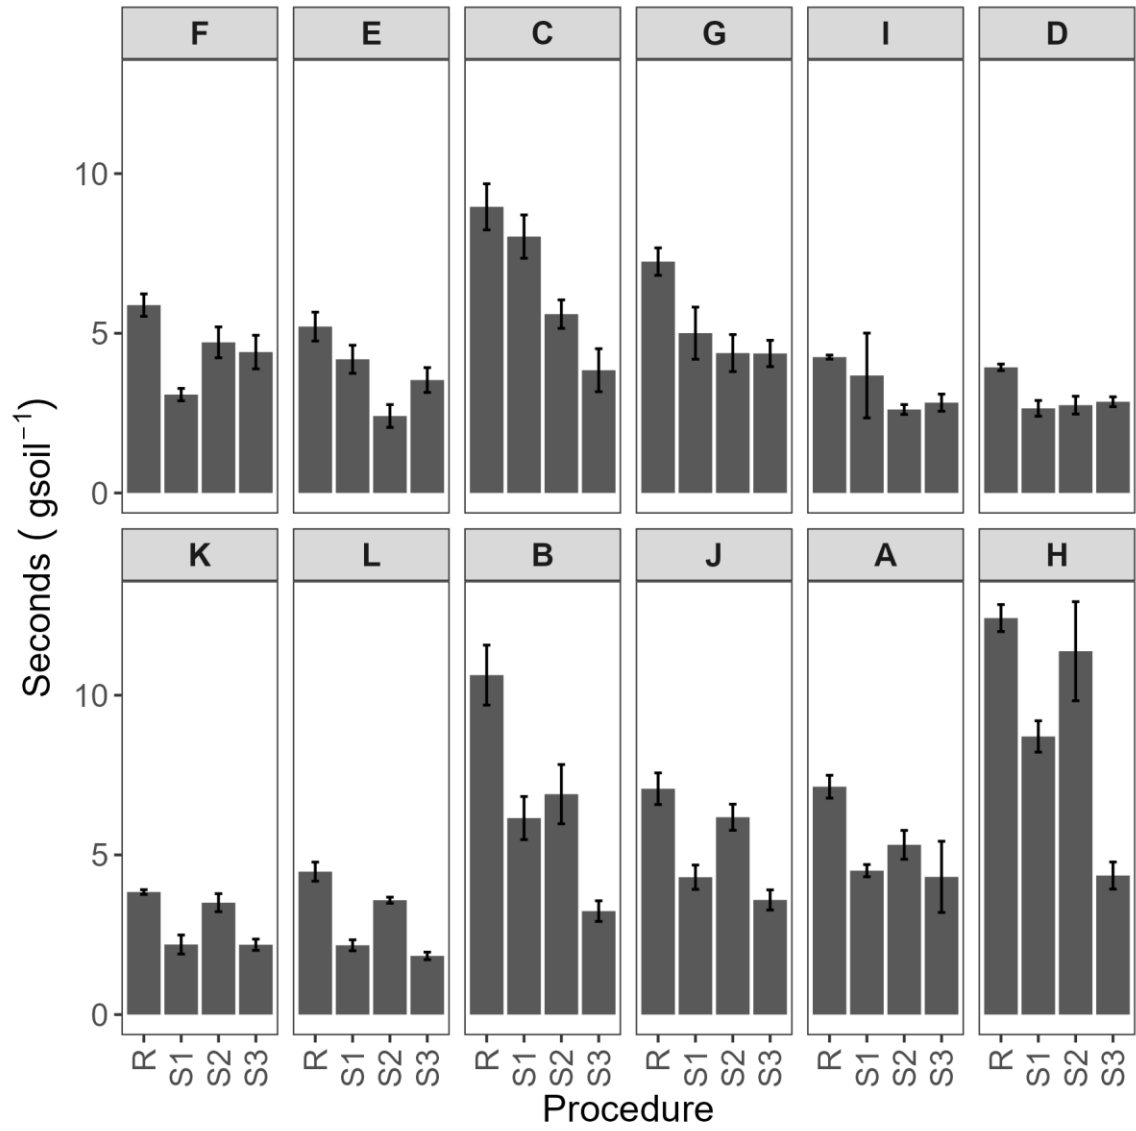

**Figure S7:** The time taken to process soils in seconds per gram of soil using for the R (8 + 2 mm), S1(4 mm), S2 (2 mm with rolling pin), and S3 (mechanical grinder) sieving procedures. Lettered panels represent the soil in ascending order of % total carbon.



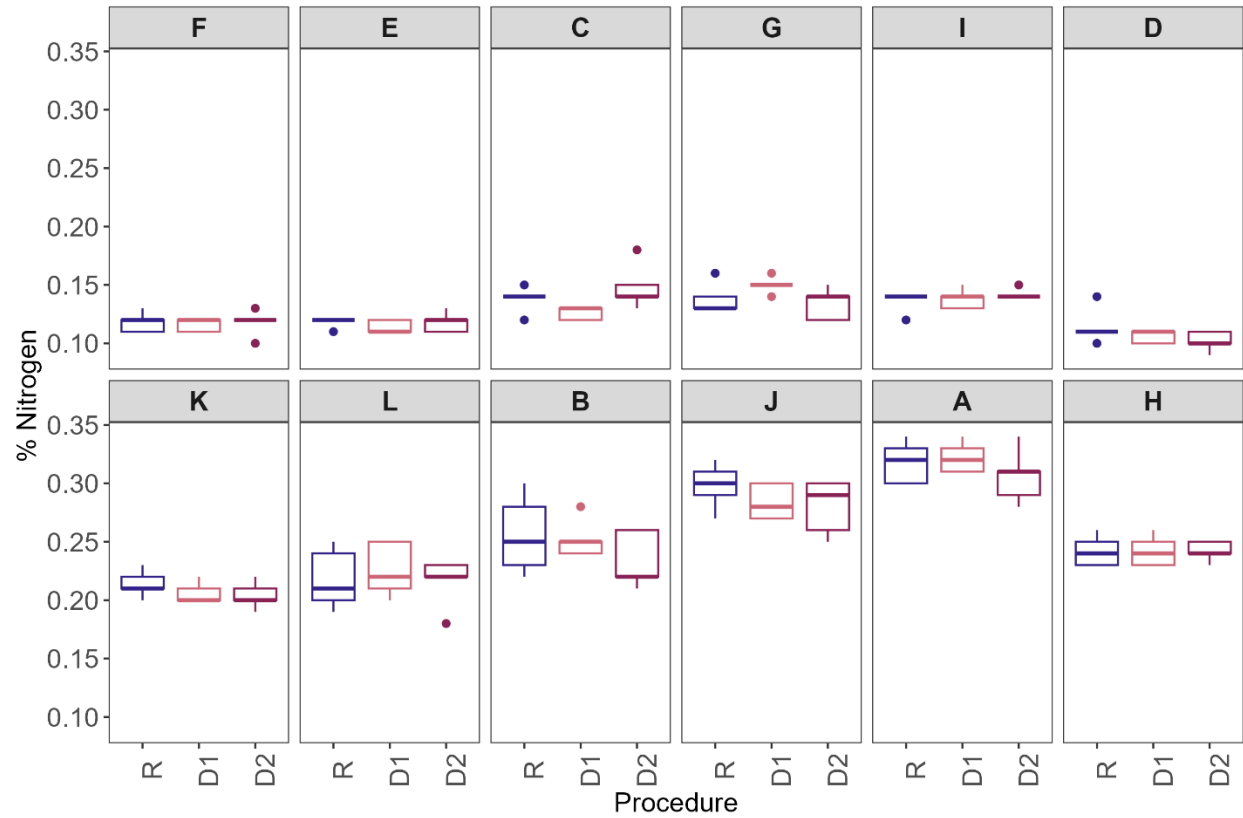

**Figure S8:** The % nitrogen distribution shown with a boxplot for R (105 °C), D1 (60 °C), and D2 (air-dried only) drying procedures. Lettered panels represent the soil in ascending order of % total carbon. All soils were sieved and finely ground using the same method. Box plots report the median, first and third quartiles. Whiskers extend to the upper and lower data point that are within 1.5 times the interquartile range.
